# Supplementary material for: An efficient recyclable magnetic material for the selective removal of organic pollutants
Source: publisher site journal article supplement (doi:10.3762/bjnano.7.136), 2016-10-13
Supplement: Additional file 1 [file 2190-4286-7-136-S1.pdf]

## **Supporting Information**

for

# **An efficient recyclable magnetic material for the selective removal of organic pollutants**

Clément Monteil<sup>1</sup>, Nathalie Bar<sup>1</sup>, Agnès Bee<sup>2</sup> and Didier Villemin\*<sup>1</sup>

Address: <sup>1</sup>UMR CNRS 6507 LCMT, Normandie Université -ENSICAEN, 6 boulevard du

Maréchal Juin, 14050 Caen, France; Tel: +33 2 31 45 28 40 and <sup>2</sup>UMR CNRS 8234

PHENIX, Université Pierre et Marie Curie, 75252 Paris Cedex 05, France

Email: Didier Villemin\* - [didier.villemin@ensicaen.fr](mailto:didier.villemin@ensicaen.fr)

\*Corresponding author

## **Additional experimental data**

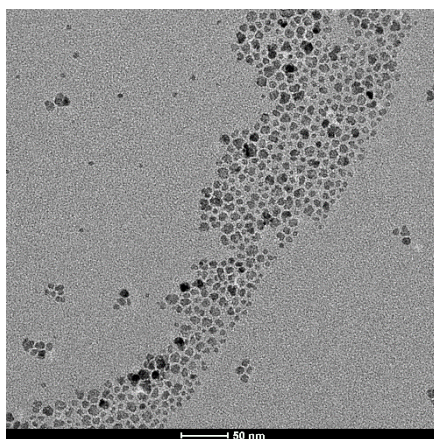

**Figure S1:** TEM image of the synthesized maghemite nanoparticles.

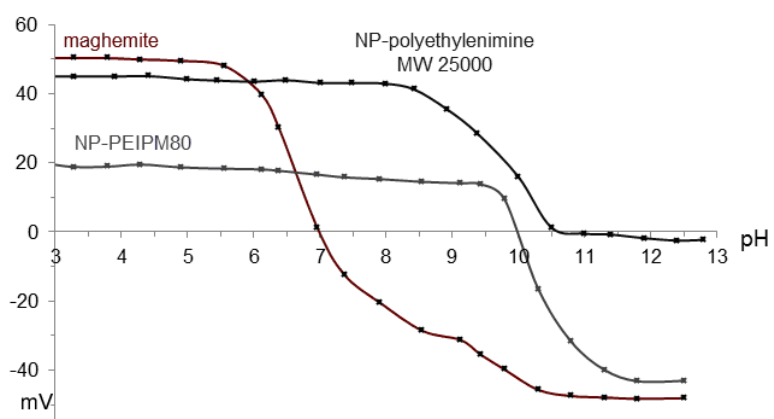

**Figure S2:** Evolution of the zeta potential of PEIP-coated nanoparticles as a function of the pH value.

### Methyl orange (MO)

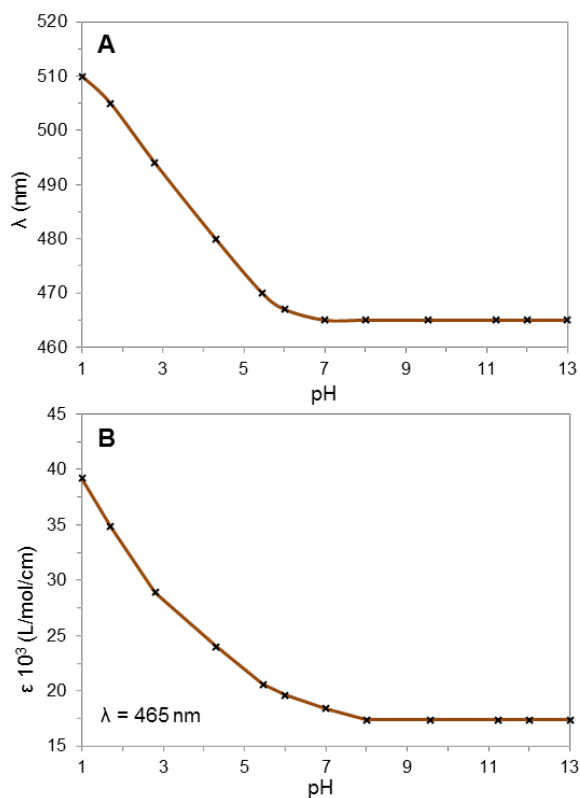

**Figure S3:** A) Evolution of the maximum absorption wavelength  $\lambda_{\max}$  as a function of the pH value. B) Evolution of the molar extinction coefficient at 465 nm as a function of the pH value. To prevent measurement inaccuracy, solutions will be adjusted to pH 14.

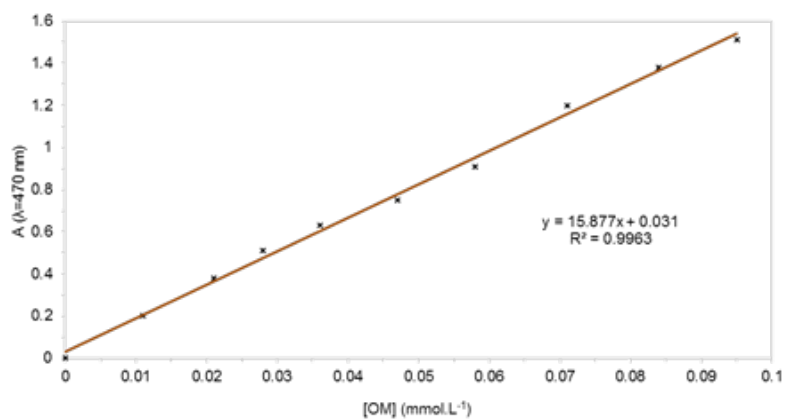

**Figure S4:** MO calibration curve, at 465 nm,  $A = f([OM])$ .

## Methylene blue (MB)

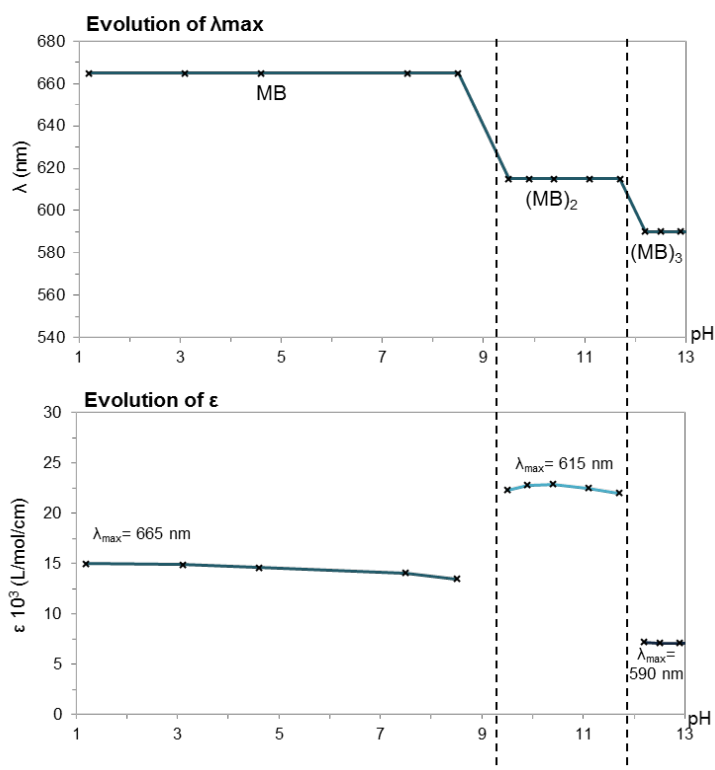

**Figure S5:** Evolution of the maximum wavelength and molar extinction coefficient as a function of the pH value. We can observe three well-separated domains with different  $\lambda_{\max}$  [1].

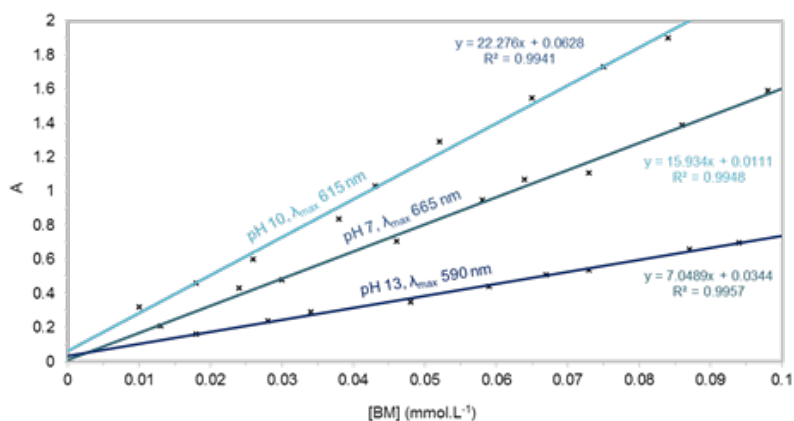

**Figure S6:** MB calibration curves for the three domains of adsorption (see Figure S5) at pH 7, 10 and 13.

## References

[1] Ghosh, A. K. *Curr. Sci.* **1974**, *43*, 655.
